# Supplementary material
Source: MDPI journal article supplement (https://www.mdpi.com/2076-3263/8/12/434)
Supplement: s1 [file s1]

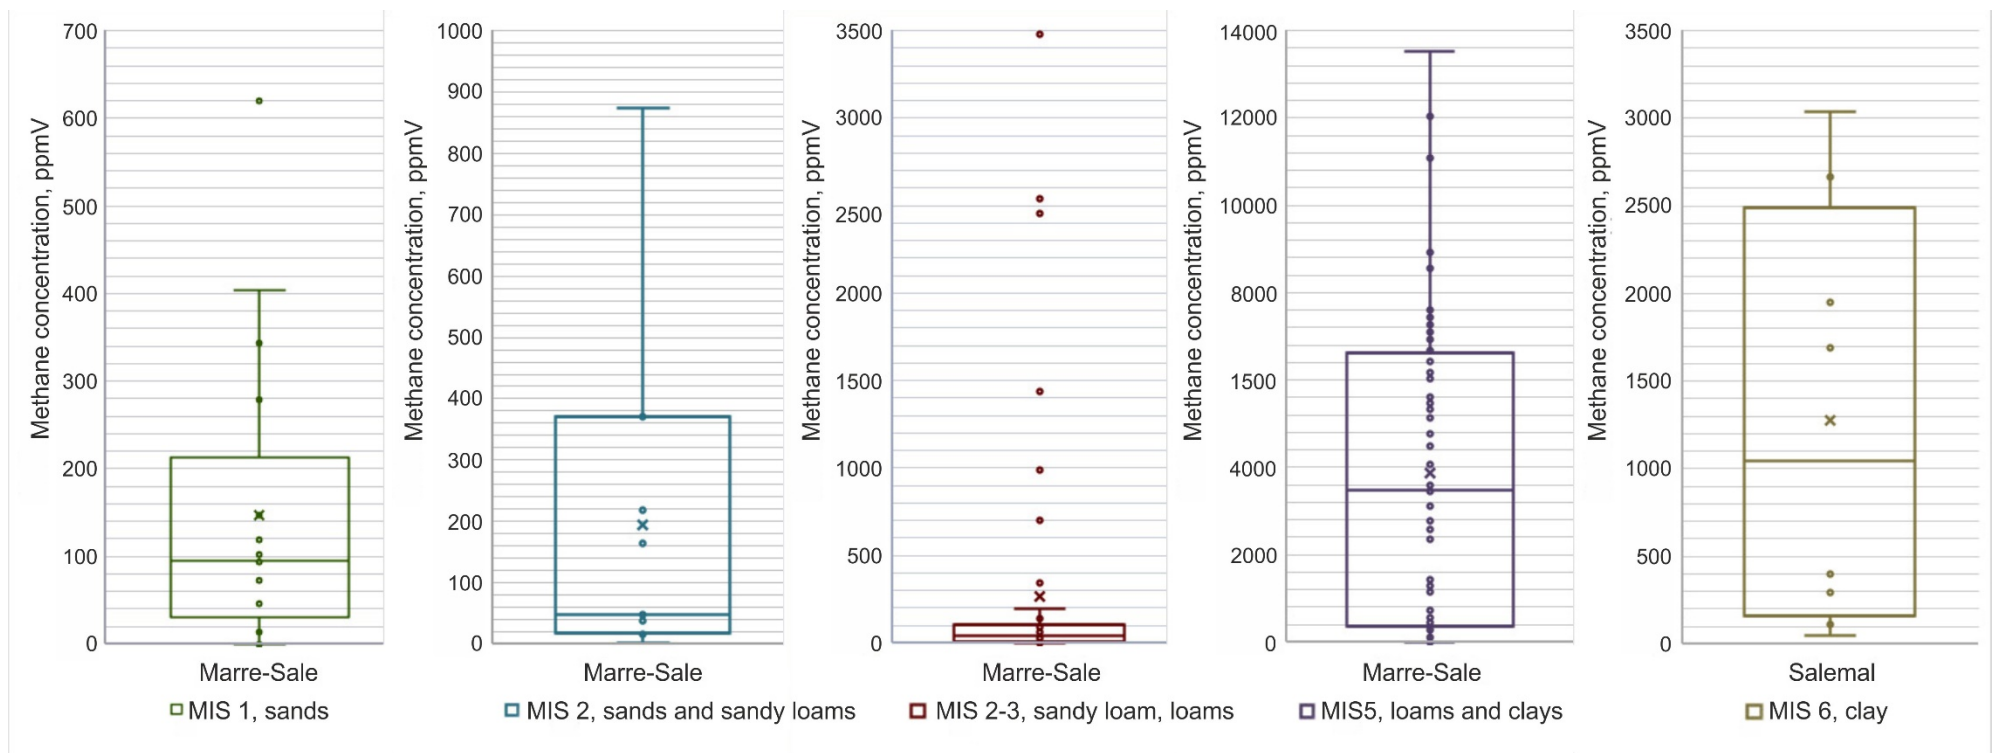

**Supplementary Figure 1.** Methane concentration in typical permafrost sediments of the study region (presented as box-plots).

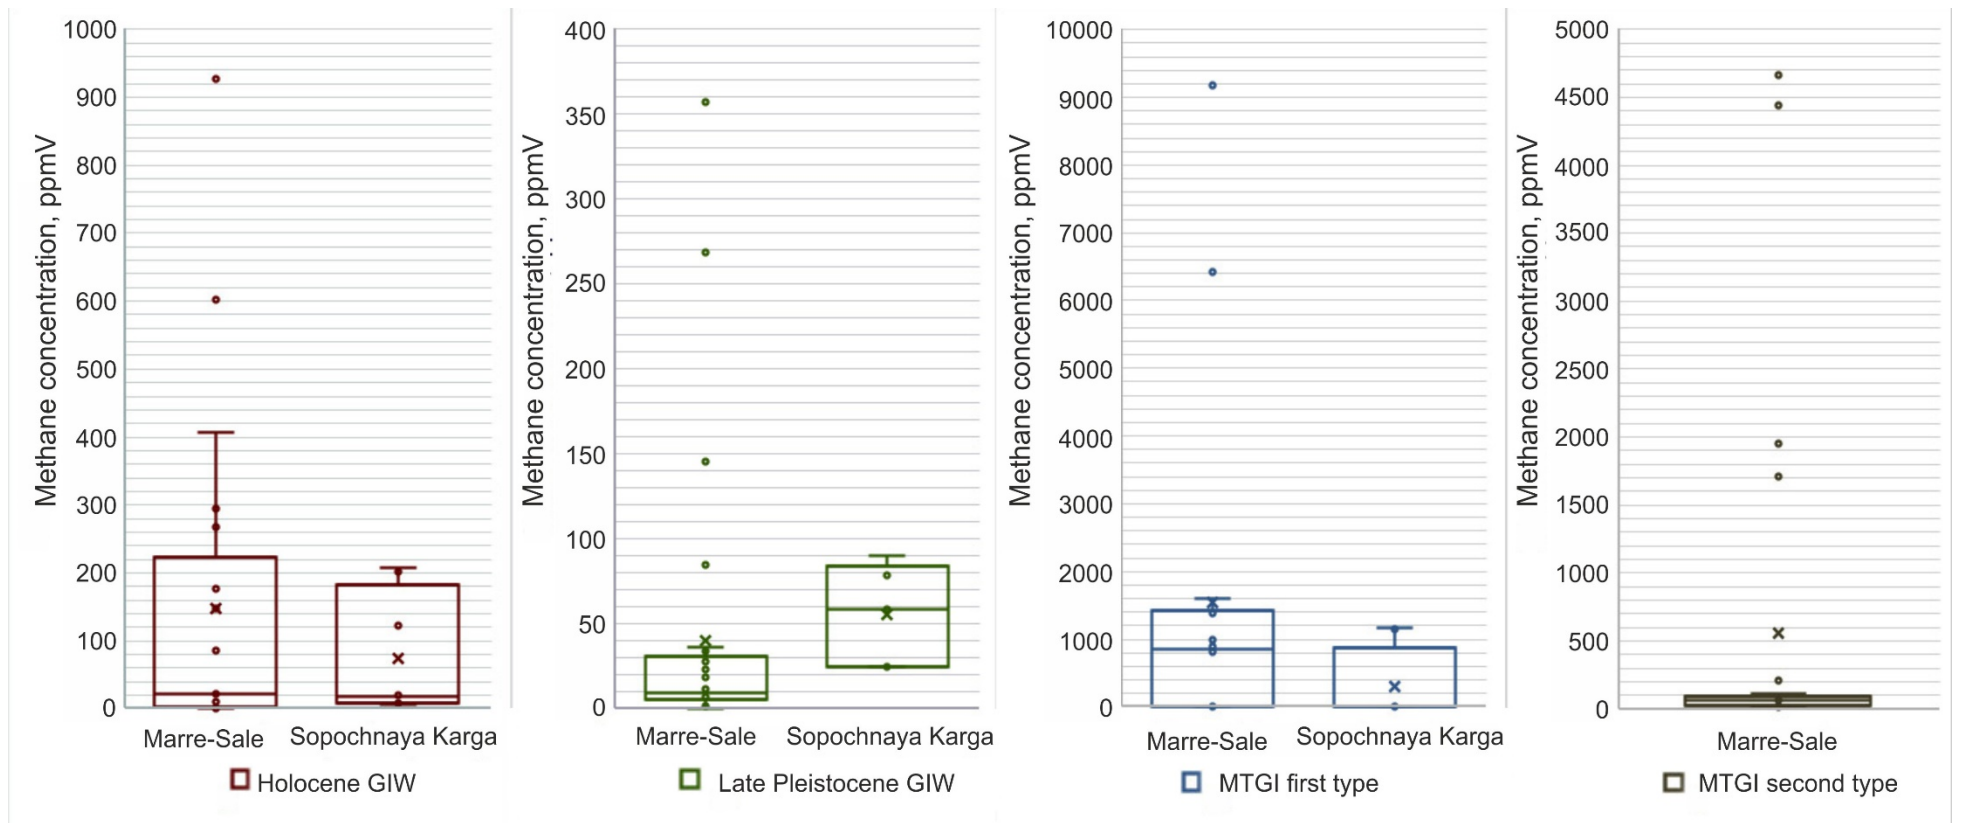

**Supplementary Figure 2.** Methane concentration in air bubbles of ground ice wedges (GIW) and massive tabular ground ice (MTGI) of Marre-Sale and Sopochnaya Karga (presented as box-plots).
